# Supplementary material for: Real-Time Monitoring of the In Situ Microfluidic Synthesis of Ag Nanoparticles on Solid Substrate for Reliable SERS Detection
Source: MDPI journal article supplement (doi:10.3390/bios11120520), 2021-12-16
Supplement: s1 [file s1]

## Article

# Real-Time Monitoring of the In Situ Microfluidic Synthesis of Ag Nanoparticles on Solid Substrate for Reliable SERS Detection

Niccolò Paccotti <sup>1,†</sup>, Alessandro Chiadò <sup>1,2,†</sup>, Chiara Novara <sup>1,\*</sup>, Paola Rivolo <sup>1</sup>, Daniel Montesi <sup>1</sup>, Francesco Geobaldo <sup>1</sup> and Fabrizio Giorgis <sup>1</sup>

<sup>1</sup> Department of Applied Science and Technology, Politecnico di Torino, C.so Duca degli Abruzzi 24, 10129 Turin, Italy; niccolo.paccotti@polito.it (N.P.); alessandro.chiado@polito.it (A.C.); paola.rivolo@polito.it (P.R.); daniel.montesi@polito.it (D.M.); francesco.geobaldo@polito.it (F.G.); fabrizio.giorgis@polito.it (F.G.)

<sup>2</sup> Center for Sustainable Future Technologies @Polito, Istituto Italiano di Tecnologia, Corso Trento 21, Torino 10129, Italy

\* Correspondence: chiara.novara@polito.it

† These authors contributed equally to this work.

**Citation:** Paccotti, N.; Chiadò, A.; Novara, C.; Rivolo, P.; Montesi, D.; Geobaldo, F.; Giorgis, F. Real-Time Monitoring of the In Situ Microfluidic Synthesis of Ag Nanoparticles on Solid Substrate for Reliable SERS Detection. *Biosensors* **2021**, *11*, 520. <https://doi.org/10.3390/bios11120520>

Received: date  
Accepted: date  
Published: date

**Publisher's Note:** MDPI stays neutral with regard to jurisdictional claims in published maps and institutional affiliations.

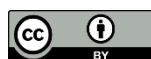

**Copyright:** © 2021 by the authors. Submitted for possible open access publication under the terms and conditions of the Creative Commons Attribution (CC BY) license (<https://creativecommons.org/licenses/by/4.0/>).

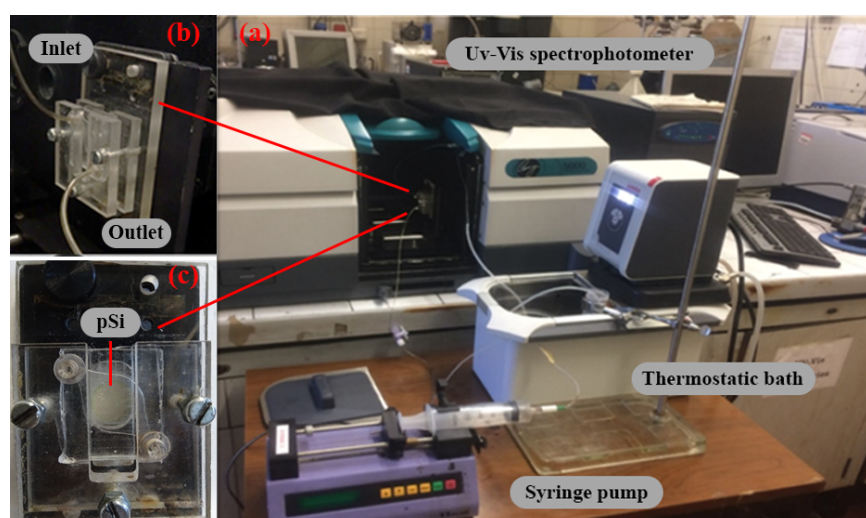

**Figure S1.** a) Overview of the complete experimental setup for the dynamic synthesis; b) and c) microfluidic chamber hosting the ultrathin pSi layer. A syringe pump drives the injection of the silver precursor solution into the microfluidic chamber located inside the UV-Vis spectrophotometer. The temperature of the precursor solution is controlled by means of a thermostatic bath.

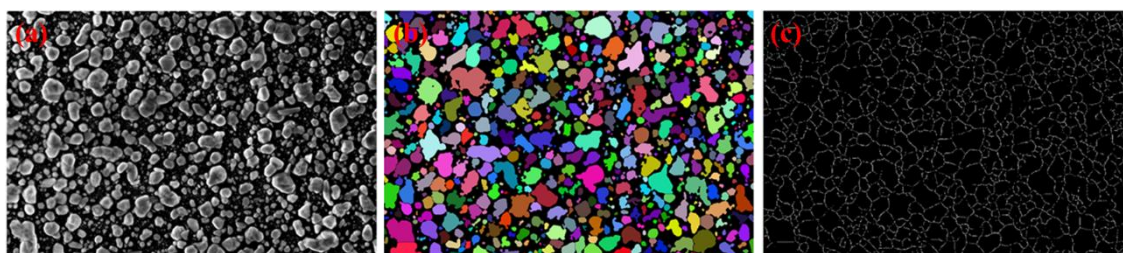

**Figure S2.** An example of image analysis – a) FESEM micrographs of a selected sample; b) identification of each nanoparticle; c) traces corresponding to the semi-distances between nanoparticles.

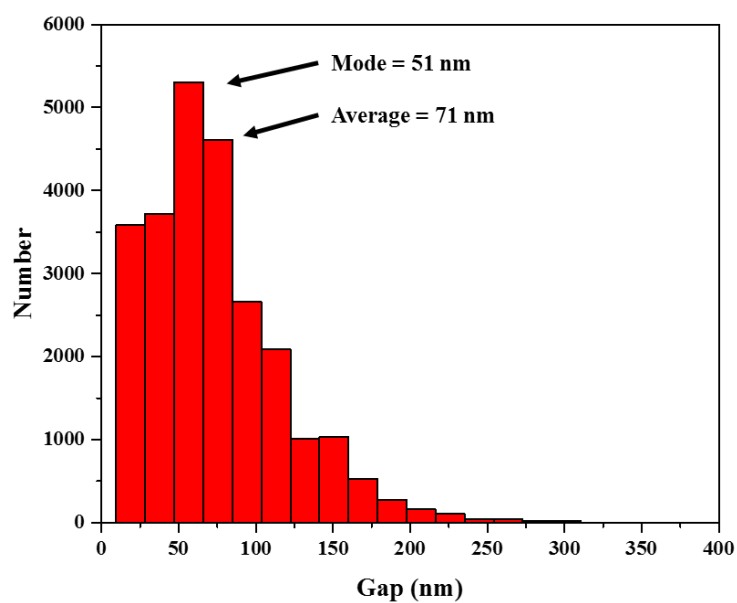

**Figure S3.** Size distribution of the inter-particle gaps.

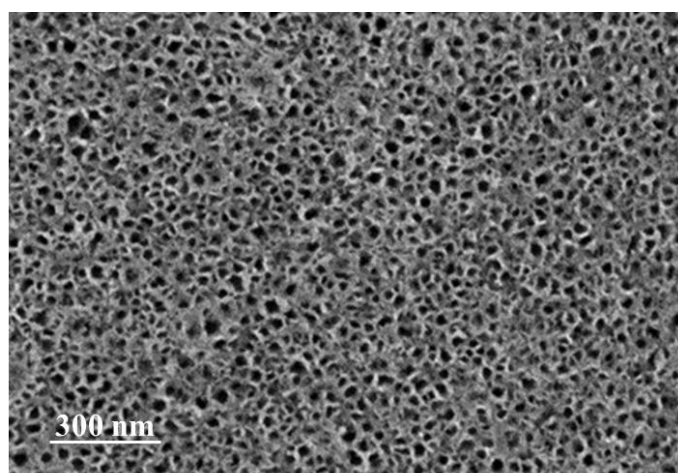

**Figure S4.** Top-view FESEM micrograph of the porous silicon membrane after the detachment from the original silicon substrate.

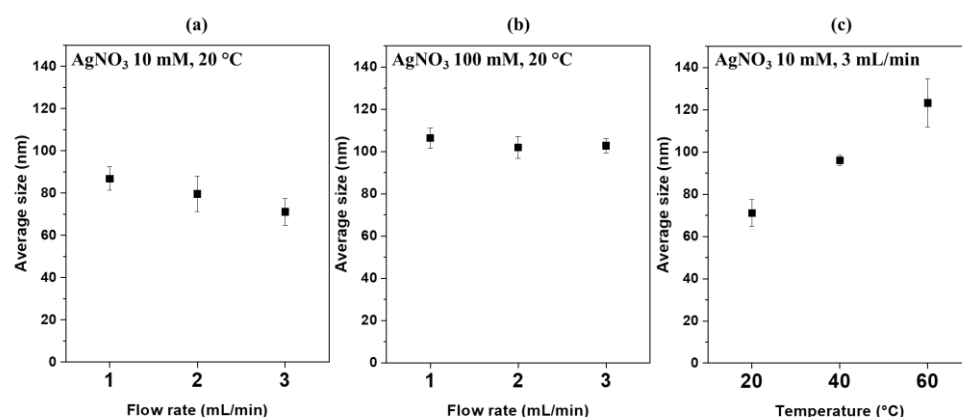

**Figure S5.** Effect on the average AgNP size of a) the flow rate at 10 mM  $\text{AgNO}_3$  concentration and 20 °C b) the flow rate at 100 mM  $\text{AgNO}_3$  concentration and 20 °C c) the temperature at 10 mM  $\text{AgNO}_3$  concentration and 3 mL/min flow rate. The error bars represent the standard deviation obtained considering three replicas for each synthesis condition.

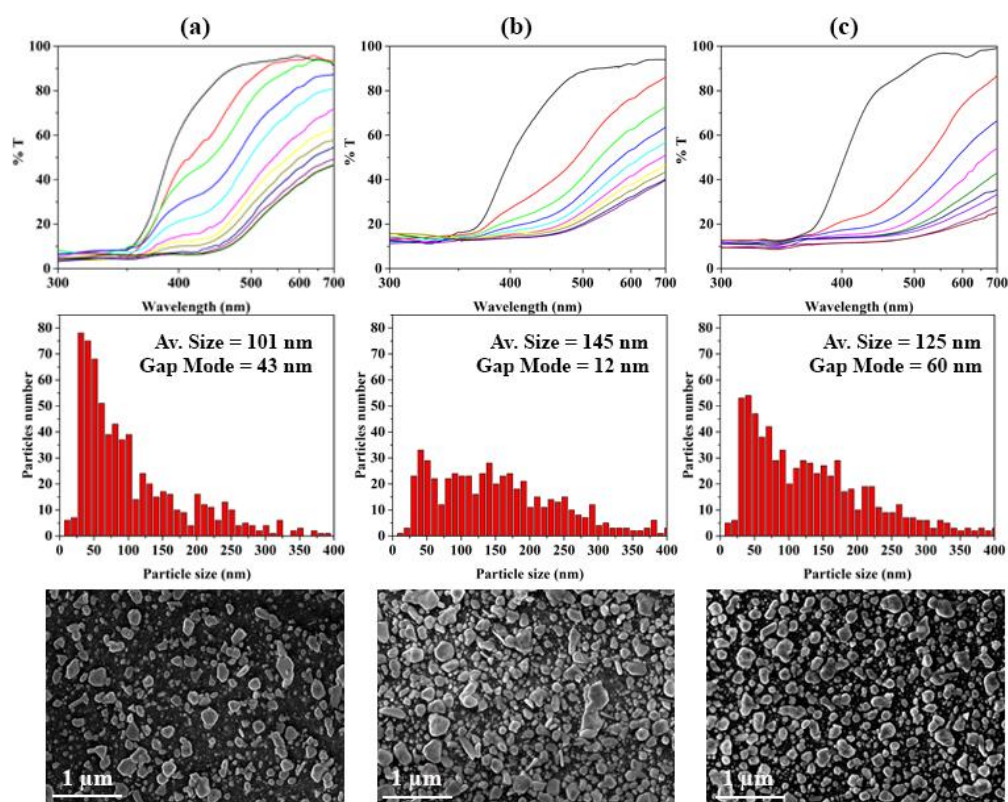

**Figure S6.** – UV-Vis transmittance spectra, particle size distribution, and FESEM micrographs of the samples synthesized in dynamic conditions using a 10 mM  $\text{AgNO}_3$  at 60 °C employing a flow rate of a) 1 mL/min b) 2 mL/min c) 3 mL/min.

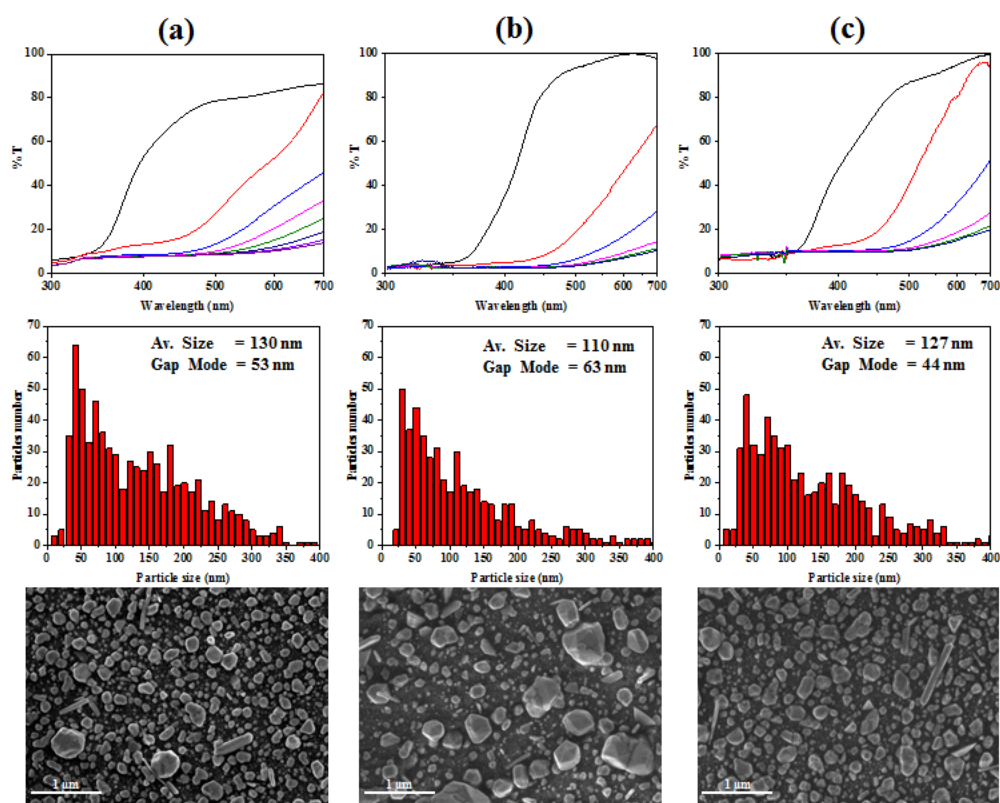

**Figure S7.** - UV-Vis transmittance spectra, particle size distribution, and FESEM micrographs of the samples synthesized in dynamic conditions using a 100 mM  $\text{AgNO}_3$  at 60 °C employing a flow rate of a) 1 mL/min b) 2 mL/min c) 3 mL/min.
